# Supplementary material for: Tuning the thickness of black phosphorus via ion bombardment-free plasma etching for device performance improvement
Source: Royal Society of Chemistry journal article supplement (doi:10.1039/c6tc01514j), 2016-01-01
Supplement: c6tc01514j1.pdf [file c6tc01514j1.pdf]

## Supporting information

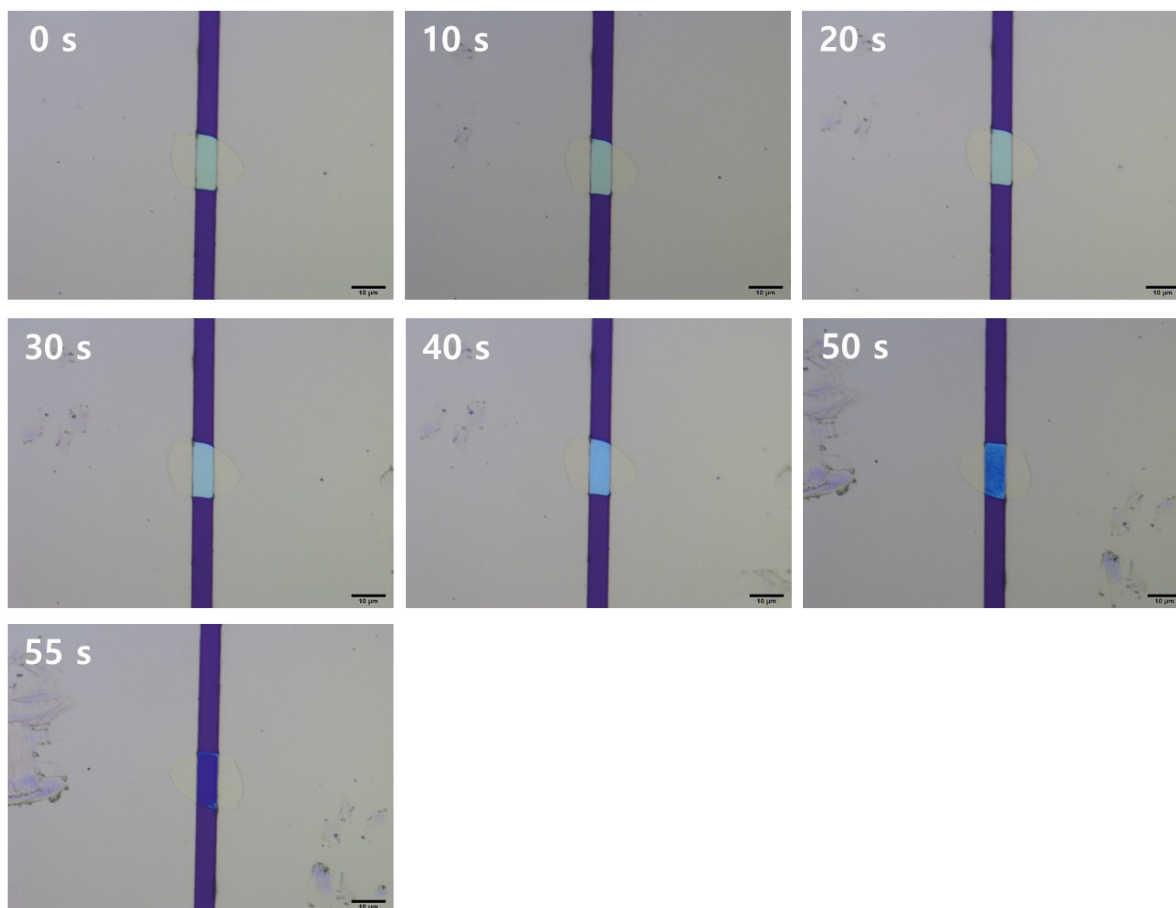

Figure S11. Optical microscope images of the fabricated BP FET as a function of plasma treatment time
